# Supplementary material for: Karyological Diversification in the Genus Lyciasalamandra (Urodela: Salamandridae)
Source: MDPI journal article supplement (doi:10.3390/ani11061709), 2021-06-08
Supplement: s1 [file s1]

**Table S1.** Chromosome morphometric parameters of the studied taxa. R.L. = Relative Length; C.I. = Centromeric Index; Sp. = Species; Chr. = Chromosome; Solid line boxes = homomorphic NORs; dashed line boxes = heteromorphic NORs

| Sp./<br>Chr. | <i>L. a. anatolyana</i> |      | <i>L. b. bilae</i> |      | <i>L. f. flavimembris</i> |      | <i>L. helverveni</i> |      | <i>L. l. luschanii</i> |      | <i>L. l. basoglu</i> |      | <i>L. l. finikensis</i> |      | <i>S. s. salamandra</i> |      | <i>S. s. giglioli</i> |      | <i>S. lanzai</i> |      |
|--------------|-------------------------|------|--------------------|------|---------------------------|------|----------------------|------|------------------------|------|----------------------|------|-------------------------|------|-------------------------|------|-----------------------|------|------------------|------|
|              | R.L.                    | C.I. | R.L.               | C.I. | R.L.                      | C.I. | R.L.                 | C.I. | R.L.                   | C.I. | R.L.                 | C.I. | R.L.                    | C.I. | R.L.                    | C.I. | R.L.                  | C.I. | R.L.             | C.I. |
| 1            | 12.4                    | 48.4 | 12.6               | 46.3 | 12.5                      | 47.9 | 13.3                 | 48.0 | 13.0                   | 46.5 | 12.8                 | 44.9 | 12.5                    | 48.4 | 12.0                    | 49.0 | 12.3                  | 43.8 | 13.9             | 48.2 |
| 2            | 11.4                    | 43.9 | 11.4               | 41.5 | 11.2                      | 42.8 | 11.6                 | 42.7 | 11.8                   | 42.5 | 11.9                 | 46.5 | 11.5                    | 43.9 | 11.3                    | 43.9 | 11.6                  | 43.5 | 12.9             | 47.3 |
| 3            | 11.0                    | 43.7 | 11.2               | 42.6 | 11.2                      | 46.4 | 11.0                 | 41.5 | 11.3                   | 41.6 | 11.2                 | 41.7 | 11.0                    | 43.7 | 11.1                    | 43.7 | 11.1                  | 48.3 | 11.6             | 46.3 |
| 4            | 10.7                    | 48.7 | 10.7               | 44.4 | 10.8                      | 45.3 | 10.9                 | 43.2 | 10.0                   | 44.7 | 10.7                 | 44.7 | 10.5                    | 48.7 | 10.9                    | 48.7 | 10.9                  | 46.7 | 10.1             | 46.2 |
| 5            | 9.8                     | 46.9 | 10.0               | 42.8 | 9.6                       | 42.7 | 9.4                  | 44.8 | 9.7                    | 42.9 | 9.1                  | 46.8 | 10.0                    | 46.9 | 10.1                    | 46.9 | 10.9                  | 49.3 | 9.2              | 39.6 |
| 6            | 9.5                     | 31.1 | 9.4                | 32.4 | 9.4                       | 30.8 | 9.2                  | 29.2 | 9.2                    | 32.4 | 9.0                  | 31.5 | 9.2                     | 33.0 | 9.4                     | 31.9 | 9.7                   | 40.6 | 8.1              | 28.0 |
| 7            | 8.3                     | 41.5 | 8.6                | 40.3 | 9.0                       | 41.2 | 8.2                  | 41.9 | 8.3                    | 40.1 | 8.2                  | 40.5 | 8.2                     | 28.5 | 8.2                     | 41.5 | 7.2                   | 41.7 | 8.0              | 46.9 |
| 8            | 7.4                     | 28.9 | 7.4                | 28.5 | 7.6                       | 29.0 | 7.5                  | 30.4 | 7.5                    | 33.5 | 7.6                  | 29.4 | 7.7                     | 33.4 | 7.6                     | 40.4 | 6.3                   | 31.8 | 7.1              | 32.0 |
| 9            | 5.8                     | 44.0 | 5.4                | 46.7 | 5.4                       | 43.0 | 5.2                  | 46.1 | 5.5                    | 42.9 | 5.4                  | 44.0 | 5.5                     | 44.0 | 5.6                     | 44.0 | 5.8                   | 46.4 | 5.4              | 40.8 |
| 10           | 5.3                     | 39.3 | 5.3                | 41.3 | 5.1                       | 42.4 | 5.2                  | 42.4 | 5.3                    | 40.4 | 5.2                  | 39.3 | 5.3                     | 39.3 | 5.4                     | 39.3 | 5.2                   | 40.0 | 4.9              | 43.8 |
| 11           | 4.4                     | 40.2 | 4.2                | 40.0 | 4.3                       | 39.7 | 4.5                  | 41.3 | 4.5                    | 40.6 | 4.9                  | 42.3 | 4.6                     | 42.3 | 4.6                     | 40.2 | 4.9                   | 42.8 | 4.7              | 40.9 |
| 12           | 4.0                     | 34.1 | 3.8                | 30.1 | 4.0                       | 35.1 | 4.0                  | 32.1 | 3.9                    | 34.1 | 4.1                  | 33.1 | 4.0                     | 30.1 | 3.8                     | 33.9 | 4.1                   | 35.2 | 4.3              | 31.4 |
